# Supplementary material for: User Acceptance of Wrist-Worn Activity Trackers Among Community-Dwelling Older Adults: Mixed Method Study
Source: PubMed Central journal article supplement (PMC5707431; doi:10.2196/mhealth.8211), 2017-11-15
Supplement: mhealth_v5i11e173_app1.pdf [file mhealth_v5i11e173_app1.pdf]

## Multimedia Appendix A

### Technology Acceptance Questionnaire

| <b>Item #</b> | <b>Corresponding dimension</b> | <b>Statement</b>                                                                                                             |
|---------------|--------------------------------|------------------------------------------------------------------------------------------------------------------------------|
|               |                                | 1 = Strongly Disagree, 2 = Disagree, 3 = Neutral, 4 = Agree, 5 = Disagree                                                    |
| L1            | PU                             | I think that monitoring my activity and health 24 hours a day, 7 days a week, can be a good thing                            |
| L2            | PR                             | I was afraid that the device would discover a major health issue                                                             |
| L3            | PC                             | I am comfortable with my health data being stored on the internet                                                            |
| L4            | FC                             | I am able to get assistance from a friend or family member to use the device, if needed                                      |
| L5            | PEOU                           | I was able to wear the device easily without help from another person                                                        |
| L6            | PEOU                           | I was able to remove the device easily without help from another person                                                      |
| L7            | EC                             | I was able to perform my daily tasks as usual while wearing the device                                                       |
| L8            | EC                             | The device was easily concealed underneath my clothing when worn                                                             |
| L9            | EC                             | At times, I forgot I was wearing the device                                                                                  |
| L10           | PR                             | I experienced skin irritations while wearing the device                                                                      |
| L11           | EC                             | The battery life of the device meets my expectations                                                                         |
| L12           | EC                             | The device's smartphone application was easy to use                                                                          |
| L13           | PEOU                           | I find the device easy to use                                                                                                |
| L14           | PEOU                           | I find the display of the device easy to read indoors                                                                        |
| L15           | PEOU                           | I find the display of the device easy to read outdoors                                                                       |
| L16           | EC                             | The device was pleasant to wear during the night                                                                             |
| L17           | EC                             | I was concerned that the device is not securely attached to me                                                               |
| L18           | PEOU                           | I was able to put the device on in a reasonable amount of time                                                               |
| L19           | PC                             | I had no concerns about my privacy while wearing the device                                                                  |
| L20           | PC                             | I am comfortable with my health data being shared with equipment manufacturers as long as it is shared anonymously           |
| L21           | FC                             | I have the knowledge necessary to use the device                                                                             |
| L22           | PU                             | I think using the device is a more efficient way to monitor my health than visiting my doctor to collect similar information |
| L23           | PU                             | Wearing the device motivated me to be more active                                                                            |
| L24           | PU                             | I think using the device can help me improve my overall health                                                               |
| L25           | PR                             | Wearing the device caused me to have joint pain                                                                              |
| L26           | PEOU                           | I was able to shower or bathe normally while wearing the device                                                              |

|     |    |                                                                                                  |
|-----|----|--------------------------------------------------------------------------------------------------|
| L27 | SN | I was embarrassed to wear the device in front of family members                                  |
| L28 | SN | My friends would encourage me to use this device                                                 |
| L29 | SN | My family members would encourage me to use this device                                          |
| L30 | PU | I think using the device can let me live at home longer by monitoring my health around the clock |
| L31 | EC | The ability to use the device in a variety of locations is important to me                       |

Additional 6 multiple-choice questions

| Item # | Corresponding dimension | Statement                                                                                                                                                                                   | Answers                                                                                                                                                                                                                                                                                                                             |
|--------|-------------------------|---------------------------------------------------------------------------------------------------------------------------------------------------------------------------------------------|-------------------------------------------------------------------------------------------------------------------------------------------------------------------------------------------------------------------------------------------------------------------------------------------------------------------------------------|
| L32    | NA                      | How useful did you find the information provided by the smart wearable device (such as step count, sleep data, heart rate) either on the wearable itself, or in the smartphone application? | a = very useful, b = somewhat useful, c = not very useful, d = not at all useful                                                                                                                                                                                                                                                    |
| L33    | NA                      | Would you use the device you used during the last 21 days to continue to monitor or track your physical activity or health?                                                                 | 1 = yes, 2 = no                                                                                                                                                                                                                                                                                                                     |
| L34    | NA                      | Over the last 21 days, how often do you think you wore the smart wearable device?                                                                                                           | a = never, b = between 0-7 days, between 11-14 days, between 14-21 days                                                                                                                                                                                                                                                             |
| L35    | NA                      | How much would you be willing to pay for the device you wore during the last 21 days?                                                                                                       | a = \$0, b = \$1-\$50, c = \$51-\$100, d = \$101-\$200, e = \$201-300, f = \$300-\$400                                                                                                                                                                                                                                              |
| L36    | NA                      | Did you find yourself looking at your health data in the smartphone application more/less often after the first few days?                                                                   | a = No, I looked at the health data fairly consistently throughout the 21-day period<br>b = Yes, I looked at the health data more often after the first few days of use<br>c = Yes, I looked at the health data less often after the first few days of use<br>d = I did not look at my health or am not interested in monitoring it |
| L37    | NA                      | Do you consider yourself to be an active person?                                                                                                                                            | 1 = yes, 0 = no                                                                                                                                                                                                                                                                                                                     |

PU: perceived usefulness

PEOU: perceived ease of use  
EC: equipment characteristics  
PC: privacy concern  
PR: perceived risk  
FC: facilitating conditions  
SN: subjective norm  
NA: not applicable
