# Supplementary material for: User Acceptance of Wrist-Worn Activity Trackers Among Community-Dwelling Older Adults: Mixed Method Study
Source: PubMed Central journal article supplement (PMC5707431; doi:10.2196/mhealth.8211), 2017-11-15
Supplement: mhealth_v5i11e173_app2.pdf [file mhealth_v5i11e173_app2.pdf]

## Multimedia Appendix B

Wilcoxon signed ranked test for individual items in the Technology Acceptance Questionnaire

| <b>Item #</b> | <b>Corresponding dimension</b> | <b>Mi Band Mean score (std)</b> | <b>MS Band Mean Score (std)</b> | <b>p value</b> |
|---------------|--------------------------------|---------------------------------|---------------------------------|----------------|
| L11           | H7 EC                          | 4.55 (0.60)                     | 2.40 (1.19)                     | 0.0004         |
| L16           | H7 EC                          | 3.95 (0.76)                     | 2.60 (1.10)                     | 0.0008         |
| L14           | H2 PEOU                        | 3.72 (0.83)                     | 4.40 (0.60)                     | 0.003          |
| L8            | H7 EC                          | 3.85 (0.88)                     | 2.80 (1.06)                     | 0.004          |
| L9            | H7 EC                          | 4.20 (0.77)                     | 3.25 (1.21)                     | 0.005          |
| L13           | H2 PEOU                        | 4.30 (0.66)                     | 3.45 (1.00)                     | 0.007          |
| L12           | H7 EC                          | 4.00 (0.79)                     | 3.10 (1.17)                     | 0.007          |
